# Supplementary material
Source: publisher figshare collection journal article supplement (https://acs.figshare.com/ndownloader/files/4697707)
Supplement: Supplementary file 1 [file 4697707]

Supporting Information for

## Changes in Surface Area and Concentrations of Semivolatile Organic Contaminants in Ageing Snow

DEBBIE A. BURNISTON,<sup>†</sup> WILLIAM J. M. STRACHAN,<sup>†</sup> JOHN T. HOFF,<sup>‡</sup> FRANK WANIA<sup>\*,§</sup>

<sup>†</sup> Aquatic Ecosystem Protection Research Division, Environment Canada, 867 Lakeshore Road, Burlington, Ontario, Canada L7R 4A6.

<sup>‡</sup> 15 Mohegan Crescent, London, Ontario, Canada N5V 2X7

<sup>§</sup> Department of Physical and Environmental Sciences, University of Toronto Scarborough, 1265 Military Trail, Toronto, Ontario, Canada M1C 1A4.

\* To whom correspondence should be addressed, E-mail: frank.wania@utoronto.ca

---

| Table of Content                                                                                                                                                                                                                                     | Page |
|------------------------------------------------------------------------------------------------------------------------------------------------------------------------------------------------------------------------------------------------------|------|
| <b>Table S1</b> Dates, meteorological conditions and specific snow surface areas for the five sampled snowfall events.                                                                                                                               | S2   |
| <b>Figure S1</b> Time course of the daily mean, maximum and minimum temperature during the ageing of snow falling during five events at Turkey Lakes in the winter of 1999/2000.                                                                     | S3   |
| <b>Table S2</b> Instrument detection limit for OCPs and PCBs in picograms.                                                                                                                                                                           | S4   |
| <b>Table S3</b> Concentration of organochlorine pesticides and chlorobenzenes in snow-melt water in pg/L SWE (mean and relative standard deviation of 3 replicates).                                                                                 | S5   |
| <b>Table S4</b> Concentration of total polychlorinated biphenyls in snowmelt water in ng/L SWE (mean and relative standard deviation of 3 replicates) and homologue composition.                                                                     | S6   |
| <b>Figure S2</b> Concentration changes of polychlorinated biphenyl congeners during the ageing of four snowpacks as a function of the congeners' snow-air partition coefficients $K_{SA}$ adjusted to the mean temperature during the ageing period. | S7   |

**Table S1** Dates, meteorological conditions and specific snow surface areas for the five sampled snowfall events.

|                                                                        | <b>Event 1</b>                     | <b>Event 2</b>            | <b>Event 3</b>           | <b>Event 4</b>         | <b>Event 5</b>                     |
|------------------------------------------------------------------------|------------------------------------|---------------------------|--------------------------|------------------------|------------------------------------|
| Day of first sampling                                                  | 23/12/99                           | 20/1/00                   | 24/1/00                  | 9/2/00                 | 16/3/00                            |
| Day of second sampling                                                 | 5/1/00                             | 31/1/00                   | 31/1/00                  | 16/2/00                | 20/3/00                            |
| Length of snow ageing in days                                          | 13                                 | 11                        | 7                        | 7                      | 4                                  |
| Wind direction and speed during snowfall                               | NE, 1.1 m/s                        | N, 2.1 m/s                | W, 1.6 m/s               | NW, 3.2 m/s            | N, 1.8 m/s                         |
| Temperature during snowfall in °C                                      | -14.2<br>(-9.2 to -18.2)           | -19.5<br>(-12.3 to -25.0) | -10.7<br>(-8.0 to -13.5) | -4.1<br>(-9.5 to -0.4) | -8.1<br>(-13.6 to -2.6)            |
| Mean and range of daily mean wind speed during ageing                  | 2.3 (0.7 to 4.6)                   | 1.5 (0.6 to 2.5)          | 1.4 (0.6 to 2.5)         | 2.2 (1.0 to 3.2)       | 2.2 (1.8 to 3.0)                   |
| SWE of snowfall event in mm                                            | 9.6 mm                             | 6.6 mm <sup>a</sup>       | 7.4 mm                   | 13.9 mm                | 11.2 mm                            |
| Range of daily mean temperature during ageing in °C                    | -16.3 to -2.5                      | -22 to -3.6               | -19.3 to -3.6            | -14 to -4              | -7.6 to +2.6                       |
| Overall range of temperature during ageing in °C                       | -21.7 to +0.7                      | -29.1 to +1.7             | -23.1 to +1.7            | -19.6 to -0.4          | -14.2 to +5.0                      |
| Mean temperature during ageing in °C                                   | -10.9                              | -12.8                     | -10.0                    | -9.7                   | -3.0                               |
| Specific surface area immediately after snowfall in cm <sup>2</sup> /g | 1223 ± 38<br>(n = 3)               | 1332 ± 203<br>(n = 4)     | 1220 ± 51<br>(n = 3)     | 1014 ± 11<br>(n = 3)   | 1115 ± 135<br>(n = 3)              |
| Specific surface area after ageing in cm <sup>2</sup> /g               | 685 ± 217<br>(n = 3)               | 595 ± 19<br>(n = 3)       | 776 ± 54<br>(n = 3)      | 559 ± 19<br>(n = 3)    | 520 ± 50<br>(n = 3)                |
| Snowmelt water volume extracted before ageing in L                     | 17.0 ± 0.3<br>(n = 3)              | 5.1 ± 0.1<br>(n = 3)      | 7.1 ± 0.2<br>(n = 3)     | 6.2 ± 0.3<br>(n = 3)   | 9.5 ± 0.1<br>(n = 3)               |
| Snowmelt water volume extracted after ageing in L                      | 23.4 ± 1.1<br>(n = 3) <sup>b</sup> | 4.8 ± 0.1<br>(n = 3)      | 6.4 ± 0.3<br>(n = 3)     | 6.1 ± 0.4<br>(n = 3)   | 11.9 ± 1.7 <sup>c</sup><br>(n = 3) |

<sup>a</sup> sum of the precipitation falling from Jan. 18 to 20, 2000, <sup>b</sup> snow meltwater volume increased during ageing, likely because of blowing snow, <sup>c</sup> snow meltwater volume increased during ageing, likely because of rain falling onto snowpack.

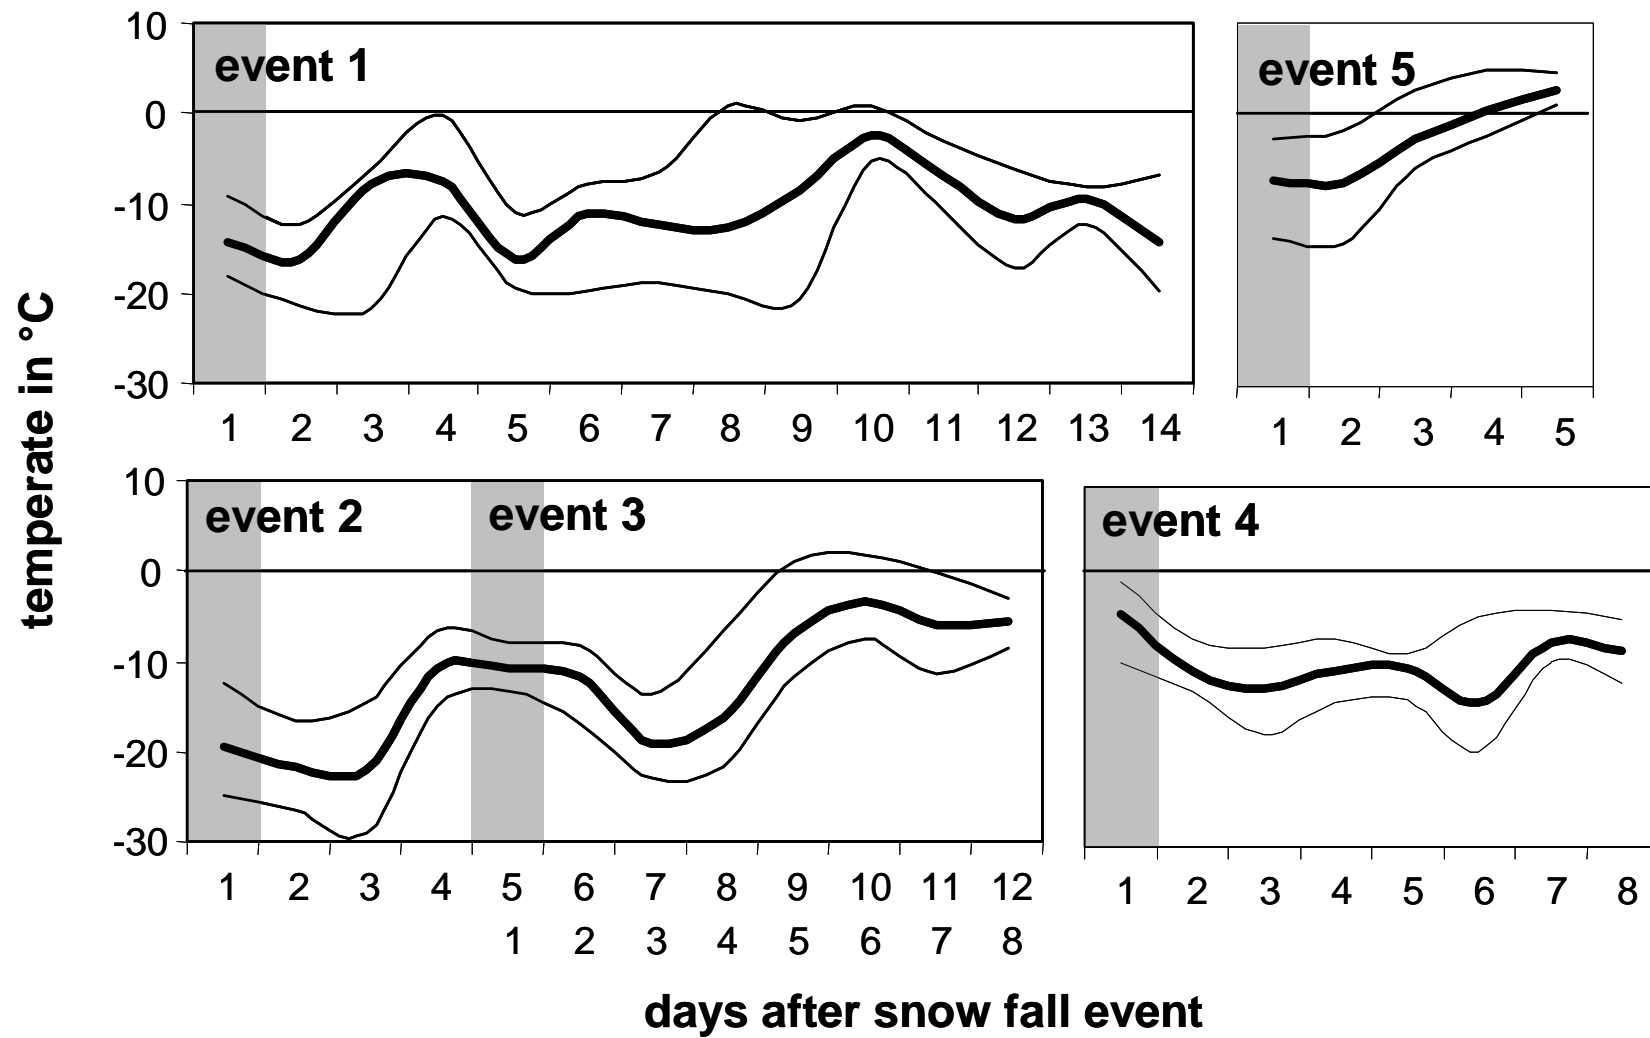

**Figure S1** Time course of the daily mean, maximum and minimum temperature during the ageing of snow falling during five events at Turkey Lakes in the winter of 1999/2000.

**Table S2** Instrument detection limit for organochlorine pesticides and polychlorinated biphenyls in picograms. Method detection limits vary between samples because of different sample volume

| OCPs                 |      | PCB      |      | PCB     |      | PCB         |      | PCB     |      |
|----------------------|------|----------|------|---------|------|-------------|------|---------|------|
| $\alpha$ -HCH        | 0.20 | 3        | 0.09 | 46      | 0.02 | 110         | 0.03 | 177     | 0.01 |
| $\beta$ -HCH         | 0.20 | 4+10     | 0.05 | 47      | 0.04 | 114         | 0.02 | 178     | 0.02 |
| $\gamma$ -HCH        | 0.30 | 5+8      | 0.11 | 48      | 0.04 | 118         | 0.02 | 180     | 0.03 |
|                      |      | 6        | 0.03 | 52      | 0.02 | 119         | 0.01 | 182+187 | 0.03 |
| dieldrin             | 0.38 | 7        | 0.04 | 56+60   | 0.04 | 124+135+144 | 0.02 | 183     | 0.02 |
| endrin               | 0.10 | 12+13    | 0.02 | 63      | 0.02 | 128         | 0.03 | 185     | 0.01 |
| heptachlor epoxide   | 0.06 | 16       | 0.03 | 66      | 0.03 | 129         | 0.01 | 189     | 0.04 |
| $\alpha$ -chlordane  | 0.03 | 17       | 0.03 | 70      | 0.03 | 130         | 0.01 | 190     | 0.01 |
| $\gamma$ -chlordans  | 0.04 | 18       | 0.05 | 74      | 0.02 | 134+143     | 0.03 | 191     | 0.04 |
| $\alpha$ -endosulfan | 0.15 | 19       | 0.02 | 81+87   | 0.02 | 136         | 0.01 | 193     | 0.01 |
| $\beta$ -endosulfan  | 0.04 | 21+33+53 | 0.05 | 82      | 0.06 | 137         | 0.02 | 194     | 0.01 |
| Trans-nonachlor      | 0.04 | 22       | 0.04 | 83      | 0.02 | 138+163     | 0.03 | 195     | 0.05 |
|                      |      | 24+27    | 0.02 | 84      | 0.02 | 141         | 0.01 | 196+203 | 0.07 |
| pp'-DDE              | 0.02 | 25       | 0.02 | 85      | 0.03 | 146         | 0.04 | 197     | 0.05 |
| pp'-DDT              | 0.05 | 26       | 0.04 | 89      | 0.01 | 151         | 0.02 | 198     | 0.03 |
| pp'-DDD              | 0.03 | 28       | 0.05 | 91      | 0.02 | 153         | 0.03 | 199     | 0.02 |
|                      |      | 29       | 0.04 | 92      | 0.08 | 156+171     | 0.03 | 201     | 0.04 |
| HCB                  | 0.04 | 31       | 0.02 | 95      | 0.03 | 157         | 0.05 | 202     | 0.01 |
| aldrin               | 0.04 | 32       | 0.02 | 97      | 0.02 | 158         | 0.01 | 205     | 0.02 |
| heptachlor           | 0.08 | 40       | 0.02 | 99      | 0.02 | 167         | 0.01 | 206     | 0.04 |
| methoxychlor         | 0.09 | 41+64+71 | 0.03 | 100     | 0.01 | 170         | 0.02 | 207     | 0.01 |
| mirex                | 0.30 | 42       | 0.03 | 101     | 0.02 | 172         | 0.02 | 208     | 0.01 |
|                      |      | 43+49    | 0.02 | 103     | 0.04 | 174         | 0.01 | 209     | 0.02 |
|                      |      | 44       | 0.02 | 105+132 | 0.03 | 175         | 0.03 |         |      |
|                      |      | 45       | 0.02 | 107+142 | 0.05 | 176         | 0.01 |         |      |

**Table S3** Concentration of organochlorine pesticides and chlorobenzenes in snowmelt water in pg/L SWE (mean and relative standard deviation of 3 replicates).

|                  | Event 1<br>fresh snow | Event 1<br>aged snow | Event 2<br>fresh snow | Event 2<br>aged snow | Event 3<br>fresh snow | Event 3<br>aged snow | Event 4<br>fresh snow | Event 4<br>aged snow | Event 5<br>fresh snow | Event 5<br>aged snow |
|------------------|-----------------------|----------------------|-----------------------|----------------------|-----------------------|----------------------|-----------------------|----------------------|-----------------------|----------------------|
| $\alpha$ -HCH    | <b>979</b> (23%)      | <b>133</b> (17%)     | <b>122</b> (9%)       | <b>54</b> (6%)       | <b>135</b> (8%)       | <b>54</b> (17%)      | <b>58</b> (22%)       | <b>61</b> (29%)      | <b>73</b> (13%)       | <b>638</b> (65%)     |
| $\gamma$ -HCH    | <b>435</b> (19%)      | <b>118</b> (15%)     | <b>126</b> (16%)      | <b>67</b> (17%)      | <b>108</b> (15%)      | <b>65</b> (21%)      | <b>177</b> (37%)      | <b>118</b> (21%)     | <b>113</b> (8.5%)     | <b>302</b> (54%)     |
| Dieldrin         | <b>198</b> (16%)      | <b>116</b> (10%)     | <b>208</b> (58%)      | <b>102</b> (18%)     | <b>117</b> (18%)      | <b>77</b> (17%)      | <b>222</b> (42%)      | <b>139</b> (19%)     | <b>84</b> (5.1%)      | <b>161</b> (42%)     |
| endosulfan-I     | <b>181</b> (24%)      | <b>76</b> (7.7%)     | <b>73</b> (28%)       | <b>52</b> (11%)      | <b>59</b> (45%)       | <b>32</b> (75%)      | <b>31</b> (71%)       | <b>64</b> (7%)       | <b>56</b> (8.3%)      | <b>122</b> (41%)     |
| endosulfan-II    | <b>11</b> (23%)       | <b>10</b> (18%)      | <b>19</b> (17%)       | <b>23</b> (18%)      | <b>6.1</b> (86%)      | <b>8.4</b> (25%)     | <b>22</b> (19%)       | <b>35</b> (14%)      | <b>22</b> (39%)       | <b>22</b> (14%)      |
| heptachlor epox. | <b>60</b> (23%)       | <b>21</b> (20%)      | <b>29</b> (16%)       | <b>17</b> (23%)      | <b>32</b> (20%)       | <b>22</b> (19%)      | <b>30</b> (16%)       | <b>26</b> (61%)      | <b>25</b> (12%)       | <b>42</b> (61%)      |
| cis-chlordane    | <b>22</b> (60%)       | <b>16</b> (16%)      | <b>22</b> (25%)       | <b>16</b> (17%)      | <b>7.1</b> (141%)     | <b>8.1</b> (34%)     | <b>20</b> (124%)      | <b>13</b> (43%)      | <b>7.3</b> (73%)      | <b>19</b> (53%)      |
| trans-chlordane  | <b>26</b> (73%)       | <b>9.2</b> (2%)      | <b>19</b> (54%)       | <b>14</b> (41%)      | <b>19</b> (71%)       | <b>14</b> (24%)      | <b>15</b> (16%)       | <b>32</b> (46%)      | <b>35</b> (15%)       | <b>54</b> (34%)      |
| trans-nonachlor  | <b>18</b> (7%)        | <b>16</b> (35%)      | <b>25</b> (43%)       | <b>10</b> (18%)      | <b>21</b> (35%)       | <b>15</b> (26%)      | <b>20</b> (11%)       | <b>12</b> (17%)      | <b>14</b> (71%)       | <b>17</b> (45%)      |
| oxychlordane     |                       | <b>10</b> (73%)      |                       | <b>15</b> (71%)      |                       | <b>11</b> (80%)      |                       |                      |                       | <b>50</b> (56%)      |
| methoxychlor     |                       |                      |                       | <b>41</b> (100%)     |                       | <b>42</b> (35%)      |                       |                      | <b>11</b> (14%)       |                      |
| pp'-DDE          | <b>8</b> (71%)        | <b>11</b> (16%)      | <b>8.0</b> (74%)      | <b>4.7</b> (141%)    | <b>4.0</b> (141%)     | <b>7.5</b> (43%)     | <b>2.9</b> (141%)     | <b>14</b> (40%)      | <b>8.7</b> (79%)      | <b>17</b> (11%)      |
| pp'-DDT          | <b>36</b> (19%)       | <b>23</b> (6.3%)     | <b>40</b> (35%)       | <b>21</b> (28%)      | <b>21</b> (88%)       | <b>10</b> (24%)      | <b>23</b> (46%)       | <b>42</b> (36%)      | <b>29</b> (49%)       | <b>57</b> (6%)       |
| pp'-DDD          |                       | <b>2.8</b> (20%)     |                       | <b>6.8</b> (141%)    |                       | <b>17</b> (8%)       | <b>23</b> (22%)       | <b>36</b> (100%)     | <b>2.8</b> (85%)      | <b>4.6</b> (71%)     |
| op'-DDE          | <b>5.2</b> (27%)      | <b>3.2</b> (77%)     |                       |                      | <b>4.1</b> (141%)     | <b>8.5</b> (29%)     |                       | <b>4.1</b> (141%)    | <b>4.5</b> (89%)      | <b>6.0</b> (71%)     |
| op'-DDT          | <b>12</b> (33%)       | <b>9.3</b> (37%)     | <b>10</b> (71%)       | <b>2.3</b> (141%)    |                       | <b>8.3</b> (16%)     |                       | <b>6.1</b> (75%)     |                       | <b>12</b> (71%)      |
| op'-DDD          |                       | <b>163</b> (8.6%)    |                       | <b>16</b> (72%)      | <b>20</b> (71%)       |                      |                       | <b>11</b> (72%)      | <b>20</b> (79%)       | <b>324</b> (61%)     |
| 135-TCB          |                       |                      |                       | <b>7.4</b> (141%)    |                       |                      |                       | <b>8.4</b> (141%)    |                       |                      |
| 124-TCB          | <b>38</b> (25%)       | <b>28</b> (19%)      | <b>179</b> (19%)      | <b>149</b> (7%)      | <b>116</b> (26%)      | <b>85</b> (27%)      | <b>73</b> (2%)        | <b>62</b> (24%)      | <b>33</b> (76%)       | <b>32</b> (31%)      |
| 123-TCB          |                       |                      | <b>10</b> (71%)       | <b>16</b> (141%)     |                       | <b>12</b> (79%)      |                       |                      | <b>13</b> (141%)      | <b>4.7</b> (141%)    |
| 1234-TECB        | <b>4.2</b> (53%)      | <b>3</b> (49%)       | <b>12</b> (12%)       | <b>4.6</b> (141%)    | <b>3.7</b> (141%)     | <b>1.9</b> (141%)    | <b>3.9</b> (74%)      | <b>5.3</b> (72%)     | <b>642</b> (71%)      | <b>2.7</b> (17%)     |
| PeCB             | <b>19</b> (49%)       | <b>10</b> (25%)      | <b>26</b> (19%)       | <b>16</b> (31%)      | <b>19</b> (20%)       | <b>11</b> (9%)       | <b>12</b> (13%)       | <b>14</b> (6%)       | <b>16</b> (72%)       | <b>20</b> (20%)      |
| HCB              | <b>11</b> (9%)        | <b>8</b> (14%)       | <b>16</b> (6%)        | <b>12</b> (10%)      | <b>24</b> (70%)       | <b>6.4</b> (5%)      | <b>12</b> (23%)       | <b>10</b> (8%)       | <b>12</b> (46%)       | <b>15</b> (9%)       |

**Table S4** Concentration of total polychlorinated biphenyls in snowmelt water in ng/L SWE (mean and relative standard deviation of 3 replicates) and homologue composition.

|                | <b>Event 1</b><br>fresh<br>snow | <b>Event 1</b><br>aged<br>snow | <b>Event 2</b><br>fresh<br>snow | <b>Event 2</b><br>aged<br>snow | <b>Event 3</b><br>fresh<br>snow | <b>Event 3</b><br>aged<br>snow | <b>Event 4</b><br>fresh<br>snow | <b>Event 4</b><br>aged<br>snow | <b>Event 5</b><br>fresh<br>snow | <b>Event 5</b><br>aged<br>snow |
|----------------|---------------------------------|--------------------------------|---------------------------------|--------------------------------|---------------------------------|--------------------------------|---------------------------------|--------------------------------|---------------------------------|--------------------------------|
| Sum PCBs 1994+ | <b>4.7</b><br>(43%)             | <b>1.8</b><br>(27%)            | <b>4.0</b><br>(36%)             | <b>2.1</b><br>(13%)            | <b>3.0</b><br>(41%)             | <b>3.3</b><br>(22%)            | <b>2.1</b><br>(24%)             | <b>2.1</b><br>(24%)            | <b>1.3</b><br>(21%)             | <b>5.0</b><br>(42%)            |
| DichloroCBs    | 3.7 %                           | 2.4 %                          | 4.6 %                           | 5.8 %                          | 7.9 %                           | 5.9 %                          | 5.7 %                           | 6.2 %                          | 4.8 %                           | 2.9 %                          |
| TrichloroCBs   | 18 %                            | 13 %                           | 14 %                            | 15 %                           | 17 %                            | 36 %                           | 20 %                            | 20 %                           | 19 %                            | 18 %                           |
| TetrachloroCBs | 39 %                            | 36 %                           | 39 %                            | 33 %                           | 38 %                            | 34 %                           | 38 %                            | 37 %                           | 37 %                            | 34 %                           |
| PentachloroCBs | 26 %                            | 29 %                           | 25 %                            | 29 %                           | 21 %                            | 17 %                           | 23 %                            | 23 %                           | 24 %                            | 27 %                           |
| HexachloroCBs  | 11 %                            | 14 %                           | 13 %                            | 14 %                           | 12 %                            | 6.1 %                          | 12 %                            | 9.5 %                          | 8.7 %                           | 13 %                           |
| HeptachloroCBs | 1.7 %                           | 2.8 %                          | 1.4 %                           | 1.3 %                          | 3.1 %                           | 0.42 %                         | 1.0 %                           | 1.4 %                          | 3.1 %                           | 1.6 %                          |
| OctachloroCBs  | 0.29 %                          | 0.55 %                         | 0.70 %                          | 0.55 %                         | 0.68 %                          | 0.21 %                         | 0.56 %                          | 0.38 %                         | 0.19 %                          | 0.10 %                         |

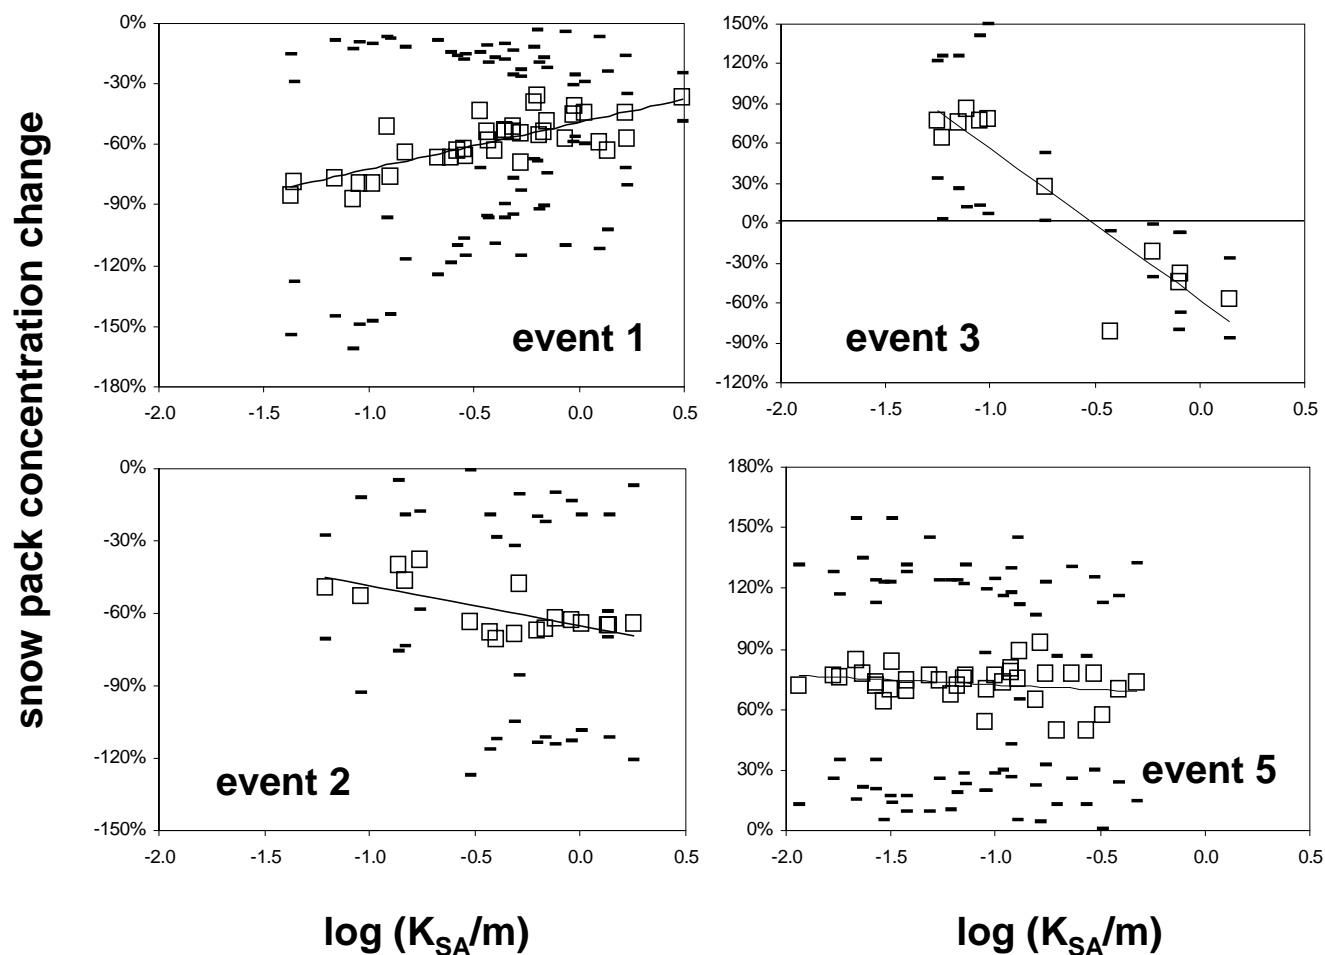

**Figure S2** Concentration changes of polychlorinated biphenyl congeners during the ageing of four snowpacks as a function of the congeners' snow-air partition coefficients  $K_{SA}$  adjusted to the mean temperature during the ageing period. Concentrations of PCBs during event 4 did not change significantly and are not displayed. Negative values indicate loss of chemical during ageing, positive values indicate a concentration increase. The square marks the mean, and the bars the mean plus/minus one standard deviation, calculated by error propagation from the standard deviation of the snow concentrations.
